# Supplementary material
Source: PubMed Central journal article supplement (PMC9122245)
Supplement: 41575_2022_608_MOESM1_ESM.pdf [file 41575_2022_608_MOESM1_ESM.pdf]

**Supplementary information**

---

**Breakthroughs in hepatitis C research: from discovery to cure**

---

In the format provided by the authors and unedited

Supplementary Table 1: Selected landmark treatment studies that established (Peg-)Interferon and Ribavirin as the standard of care in HCV infection

| Study/Authors                       | Year of publication | Study Design                                                                       | Treatment                                                                                                                                              | Key Results                                                                                                                                                                                                                             | Major Contribution                                                            |
|-------------------------------------|---------------------|------------------------------------------------------------------------------------|--------------------------------------------------------------------------------------------------------------------------------------------------------|-----------------------------------------------------------------------------------------------------------------------------------------------------------------------------------------------------------------------------------------|-------------------------------------------------------------------------------|
| Hoofnagle et al.<br><sup>1</sup>    | 1986                | single-arm pilot study<br><br>n=10 patients with NANBH                             | 0.5 to 5 million units IFN alfa either daily, every other day, or three times weekly<br><br>up to 12 months of therapy                                 | n=8/10 patients showed a substantial decrease in ALT levels<br>IFN therapy associated with an improvement of liver histology                                                                                                            | Proof-of-principle for the value of IFN in NANBH (HCV infection)              |
| Di Bisceglie et al.<br><sup>2</sup> | 1989                | randomized, double-blind, placebo-controlled trial<br><br>n=41 patients with NANBH | Two treatment arms:<br><br>A: 1 million units IFN per day for seven days followed by 2 million units three times a week for 23 weeks<br><br>B: Placebo | ALT decrease and histological improvement in the treatment but not in the placebo arm<br><br>Relapse of ALT levels in the majority of patients after the end of treatment<br><br>Sustained response in only 10% of IFN treated patients | The first randomized, placebo-controlled trial regarding IFN in HCV infection |
| Davis et al.<br><sup>3</sup>        | 1989                | A multicenter randomized, controlled trial<br><br>n=166 patients                   | Three treatment arms:<br><br>A: no treatment                                                                                                           | Substantial ALT decrease to or near to normal values in 8% (A), 23% (B) and 46% (C)                                                                                                                                                     | Established IFN monotherapy as the standard of care in chronic HCV infection  |

|                                     |      |                                                                             |                                                                                                                                                  |                                                                                                                                             |                                                                                                                                                                               |
|-------------------------------------|------|-----------------------------------------------------------------------------|--------------------------------------------------------------------------------------------------------------------------------------------------|---------------------------------------------------------------------------------------------------------------------------------------------|-------------------------------------------------------------------------------------------------------------------------------------------------------------------------------|
|                                     |      | with chronic HCV infection                                                  | <p>B: 1 million units IFN three times a week</p> <hr/> <p>C: 3 million units IFN three times a week</p> <hr/> <p>Treatment duration 24 weeks</p> | Relapse after the end of treatment in 44-51% of patients                                                                                    | Demonstrated a higher efficacy of 3 million units compared to 1 million units IFN                                                                                             |
| Reichard et al.<br><sup>4</sup>     | 1991 | single-arm pilot study<br><br>n=10 patients with chronic HCV infection      | RBV at a dose of 1000-1200mg for 12 weeks                                                                                                        | <p>Significant decrease in ALT levels during treatment</p> <p>Relapse to pretreatment levels within 6-12 weeks after the end of therapy</p> | Proof-of-principle for the efficacy of RBV in HCV infection                                                                                                                   |
| Di Bisceglie et al.<br><sup>5</sup> | 1992 | single-arm study<br><br>n=13 patients with chronic HCV infection            | RBV (increasing dosage from 600mg to 1200mg per day) for six months                                                                              | <p>A slight decrease of HCV RNA during treatment</p> <p>No patient lost HCV RNA during treatment</p>                                        | Demonstrated the insufficient antiviral efficacy of RBV monotherapy                                                                                                           |
| Jäckel et al.<br><sup>6</sup>       | 2001 | single-arm, multicenter study<br><br>n=44 patients with acute HCV infection | 5 million units IFN three times per week<br>Treatment duration: 24 weeks                                                                         | SVR in 98% of patients                                                                                                                      | <p>Established IFN monotherapy as the standard of care for acute HCV infection</p> <p>Demonstrated the higher efficacy of IFN therapy in the acute phase of HCV infection</p> |

|                       |      |                                                                                                                                            |                                                                                                                                                                                                                                               |                                                               |                                                                                   |
|-----------------------|------|--------------------------------------------------------------------------------------------------------------------------------------------|-----------------------------------------------------------------------------------------------------------------------------------------------------------------------------------------------------------------------------------------------|---------------------------------------------------------------|-----------------------------------------------------------------------------------|
| Kakumu et al.<br>7    | 1993 | A randomized, controlled study<br><br>n=27 patients with chronic HCV infection                                                             | Three treatment arms:<br>A: RBV (800-1000mg per day)<br>-----<br>B: IFN beta (3 million units three times per week)<br>-----<br>C: IFN beta (3 million units three times per week) + RBV (800-1000mg per day)<br>Treatment duration: 24 weeks | SVR rates:<br><br>A: 0%<br>-----<br>B: 22%<br>-----<br>C: 33% | Providing valuable data for a synergistic antiviral effect of RBV with IFN (beta) |
| Brillanti et al.<br>8 | 1994 | A randomized, controlled study<br><br>n= 20 patients with chronic HCV infection and previous relapse (n=10) or null-response (n=10) to IFN | Two treatment arms:<br>A: IFN (3 million units three times per week)<br>-----<br>B: IFN (3 million units three times per week) + RBV (800mg per day)<br>-----<br>Treatment duration: 6 months                                                 | SVR rates:<br><br>A: 0%<br>-----<br>B: 40%                    | The first randomized study demonstrating a synergistic value of IFN alfa and RBV  |
| Poynard et al.<br>9   | 1998 | A randomized, multicenter, double-blind, placebo-                                                                                          | Three treatment arms:<br>A: IFN (3 million units three times per week) +                                                                                                                                                                      | SVR rates:<br><br>A: 43%                                      | Established IFN + RBV as the standard of care in chronic HCV infection            |

|                                  |             |                                                                                                                           |                                                                                                                                                                                                                                                                                                                                                |                                                                                            |                                                                                                                                                                    |
|----------------------------------|-------------|---------------------------------------------------------------------------------------------------------------------------|------------------------------------------------------------------------------------------------------------------------------------------------------------------------------------------------------------------------------------------------------------------------------------------------------------------------------------------------|--------------------------------------------------------------------------------------------|--------------------------------------------------------------------------------------------------------------------------------------------------------------------|
|                                  |             | <p>controlled trial</p> <p>n=832 patients with chronic HCV infection</p>                                                  | <p>RBV (1000-1200mg per day) for 48 weeks</p> <hr/> <p>B: IFN (3 million units three times per week) + RBV (1000-1200mg per day) for 24 weeks</p> <hr/> <p>C: IFN (3 million units three times per week) + placebo for 48 weeks</p>                                                                                                            | <p>B: 35%</p> <hr/> <p>C: 19%</p>                                                          | <p>Demonstrated the higher efficacy of a 48-weeks compared to a 24-weeks regimen</p>                                                                               |
| <p>McHutchison et al.<br/>10</p> | <p>1998</p> | <p>A randomized, multicenter, double-blind, placebo-controlled trial</p> <p>n=912 patients with chronic HCV infection</p> | <p>Four treatment arms:</p> <p>A: IFN (3 million units three times per week) + placebo for 24 weeks</p> <hr/> <p>B: IFN (3 million units three times per week) + placebo for 48 weeks</p> <hr/> <p>C: IFN (3 million units three times per week) + RBV (1000-1200mg per day) for 24 weeks</p> <hr/> <p>D: IFN (3 million units three times</p> | <p>SVR rates:</p> <p>A: 6%</p> <hr/> <p>B: 13%</p> <hr/> <p>C: 31%</p> <hr/> <p>D: 38%</p> | <p>Established IFN + RBV as the standard of care in chronic HCV infection</p> <p>Demonstrated the higher efficacy of a 48-weeks compared to a 24-weeks regimen</p> |

|                                |      |                                                                                                                           |                                                                                                                                                                                                      |                                                                 |                                                                                                                                                                  |
|--------------------------------|------|---------------------------------------------------------------------------------------------------------------------------|------------------------------------------------------------------------------------------------------------------------------------------------------------------------------------------------------|-----------------------------------------------------------------|------------------------------------------------------------------------------------------------------------------------------------------------------------------|
|                                |      |                                                                                                                           | per week) + RBV (1000-1200mg per day) for 48 weeks                                                                                                                                                   |                                                                 |                                                                                                                                                                  |
| Heathcote et al. <sup>11</sup> | 2000 | A randomized, multicenter study<br><br>n=271 patients with chronic HCV infection and advanced liver fibrosis or cirrhosis | Three treatment arms:<br>A: IFN (3 million units three times per week) for 48 weeks<br><hr/> B: Peg-IFN-2a (90µg per week) for 48 weeks<br><hr/> C: Peg-IFN-2a (180µg per week) for 48 weeks         | SVR rates:<br><br>A: 8%<br><br><hr/> B: 15%<br><br><hr/> C: 30% | Demonstrated the higher efficacy of Peg-IFN compared to IFN in patients with advanced liver disease<br><br>Demonstrated the higher efficacy of the 180µg regimen |
| Zeuzem et al. <sup>12</sup>    | 2000 | A randomized, multicenter study<br><br>n=531 patients with chronic HCV                                                    | Two treatment arms:<br>A: Peg-IFN-2a (180µg per week) for 48 weeks<br><hr/> B: IFN (6 million units three times per week for 12 weeks followed by 3 million units three times per week for 36 weeks) | SVR rates:<br><br>A: 39%<br><br><hr/> B: 19%                    | Demonstrated the higher efficacy of Peg-IFN compared to IFN                                                                                                      |
| Manns et al. <sup>13</sup>     | 2001 | A randomized, multicenter study<br><br>n=1530 patients with chronic                                                       | Three treatment arms:<br>A: IFN (3 million units three times per week) + RBV (1000–                                                                                                                  | SVR rates:<br><br>A: 47%                                        | Established Peg-IFN + RBV as the standard of care in chronic HCV infection                                                                                       |

|                    |      |                                                                                        |                                                                                                                                                                                                                                                                              |                                                                         |                                                                                                                                                                                 |
|--------------------|------|----------------------------------------------------------------------------------------|------------------------------------------------------------------------------------------------------------------------------------------------------------------------------------------------------------------------------------------------------------------------------|-------------------------------------------------------------------------|---------------------------------------------------------------------------------------------------------------------------------------------------------------------------------|
|                    |      | HCV infection                                                                          | <p>1200 mg per day) for 48 weeks</p> <hr/> <p>B: Peg-IFN-alfa-2b (1.5 µg/kg per week) + RBV (800 mg per day) for 48 weeks</p> <hr/> <p>C: Peg-IFN-alfa-2b (4 weeks 1.5 µg/kg and 44 weeks 0.5 µg/kg) plus RBV (1000–1200mg per day)</p>                                      | <p>B: 54%</p> <hr/> <p>C: 47%</p>                                       | Demonstrated a slightly superior efficacy of Peg-IFN compared to IFN                                                                                                            |
| Fried et al.<br>14 | 2002 | <p>randomized, multicenter study</p> <p>n=1121 patients with chronic HCV infection</p> | <p>Two treatment arms:</p> <p>A: Peg-IFN-2a (180µg per week) + RBV (1000-1200mg per day) for 48 weeks</p> <hr/> <p>B: Peg-IFN-2a (180µg/week) + placebo for 48 weeks</p> <hr/> <p>C: IFN (3 million units three times per week) + RBV (1000-1200mg per day) for 48 weeks</p> | <p>SVR rates:</p> <p>A: 56%</p> <hr/> <p>B: 29%</p> <hr/> <p>C: 44%</p> | <p>Significantly contributed to establishing Peg-IFN + RBV as the standard of care in chronic HCV infection</p> <p>Confirmed a superior efficacy of Peg-IFN compared to IFN</p> |

ALT: Alanine transaminase; HCV: Hepatitis C Virus; IFN: Interferon-alfa; NANBH: Non-A, non-B hepatitis; Peg-IFN: pegylated-Interferon alfa; RNA: ribonucleic acid; RBV: Ribavirin; mg: milligram; SVR: sustained virological response; µg: microgram; kg: kilogram;





Supplementary Table 2: Important adverse events during Interferon-based antiviral regimens<sup>a</sup>

|                        | Peg-IFN–RBV dual therapy | Peg-IFN–RBV–BOC     | Peg-IFN–RBV–TLV     |
|------------------------|--------------------------|---------------------|---------------------|
| Fatigue                | 57-60%                   | 53-57%              | 57-58%              |
| Influenza-like illness | 26-28%                   | 23-25%              | 28-29%              |
| Pyrexia                | 24-33%                   | 32-33%              | 26-30%              |
| Irritability           | 18-24%                   | 22-23%              | 19-22%              |
| Pruritus               | 27-36%                   | 24-26%              | 45-50%              |
| Rash                   | 23-24%                   | 24-25%              | 35-37%              |
| Alopecia               | 20-27%                   | 20-28%              | 22-23%              |
| Nausea                 | 31-42%                   | 43-48%              | 40-43%              |
| Diarrhea               | 22%                      | 22-27%              | 28-32%              |
| Headache               | 39-42%                   | 46%                 | 41-43%              |
| Anemia                 | 19-29%                   | <sup>b</sup> 49%    | <sup>b</sup> 37-39% |
| Neutropenia            | 19-21%                   | 25%                 | 14-17%              |
| Insomnia               | 31-33%                   | 32-33%              | 32%                 |
| Depression             | 22%                      | 19-23%              | 17-18%              |
| Cough                  | 21-24%                   | 15-20%              | 17-21%              |
| Myalgia                | 21-26%                   | 21-25%              | 15-21%              |
| Athralgia              | 18-19%                   | 19-20%              | 13-15%              |
| Dysgeusia              | <10%-18%                 | <sup>b</sup> 37-43% | <10%                |

<sup>a</sup>According to the phase 3 studies investigating telaprevir and boceprevir in previously untreated HCV patients. No head-to-head comparison between telaprevir and boceprevir has been performed.

<sup>b</sup>Adverse events that were more common in PI based regimens <sup>15, 16</sup>.

PI: protease-inhibitor; Peg-IFN: pegylated-interferon alfa; RBV: Ribavirin; BOC: boceprevir; TLV: telaprevir

1. Hoofnagle, J. H. et al. Treatment of chronic non-A,non-B hepatitis with recombinant human alpha interferon. A preliminary report. *N Engl J Med* 315, 1575–1578 (1986).
2. Di Bisceglie, A. M. et al. Recombinant interferon alfa therapy for chronic hepatitis C. A randomized, double-blind, placebo-controlled trial. *N Engl J Med* 321, 1506–1510 (1989).
3. Davis, G. L. et al. Treatment of chronic hepatitis C with recombinant interferon alfa. A multicenter randomized, controlled trial. *N Engl J Med* 321, 1501–1506 (1989).
4. Reichard, O., Andersson, J., Schvarcz, R. & Weiland, O. Ribavirin treatment for chronic hepatitis C. *Lancet* 337, 1058–1061 (1991).
5. Di Bisceglie, A. M. et al. A pilot study of ribavirin therapy for chronic hepatitis C. *Hepatology* 16, 649–654 (1992).
6. Jaeckel, E. et al. Treatment of acute hepatitis C with interferon alfa-2b. *N Engl J Med* 345, 1452–1457 (2001).
7. Kakumu, S. et al. A pilot study of ribavirin and interferon beta for the treatment of chronic hepatitis C. *Gastroenterology* 105, 507–512 (1993).
8. Brillanti, S. et al. A pilot study of combination therapy with ribavirin plus interferon alfa for interferon alfa-resistant chronic hepatitis C. *Gastroenterology* 107, 812–817 (1994).
9. Poynard, T. et al. Randomised trial of interferon alpha2b plus ribavirin for 48 weeks or for 24 weeks versus interferon alpha2b plus placebo for 48 weeks for treatment of chronic infection with hepatitis C virus. International Hepatitis Interventional Therapy Group (IHIT). *Lancet* 352, 1426–1432 (1998).
10. McHutchison, J. G. et al. Interferon alfa-2b alone or in combination with ribavirin as initial treatment for chronic hepatitis C. Hepatitis Interventional Therapy Group. *N Engl J Med* 339, 1485–1492 (1998).
11. Heathcote, E. J. et al. Peginterferon alfa-2a in patients with chronic hepatitis C and cirrhosis. *N Engl J Med* 343, 1673–1680 (2000).
12. Zeuzem, S. et al. Peginterferon alfa-2a in patients with chronic hepatitis C. *N Engl J Med* 343, 1666–1672 (2000).
13. Manns, M. P. et al. Peginterferon alfa-2b plus ribavirin compared with interferon alfa-2b plus ribavirin for initial treatment of chronic hepatitis C: a randomised trial. *Lancet* 358, 958–965 (2001).
14. Fried, M. W. et al. Peginterferon alfa-2a plus ribavirin for chronic hepatitis C virus infection. *N Engl J Med* 347, 975–982 (2002).
15. Poordad, F. et al. Boceprevir for untreated chronic HCV genotype 1 infection. *N Engl J Med* 364, 1195–1206 (2011).
16. Sherman, K. E. et al. Response-guided telaprevir combination treatment for hepatitis C virus infection. *N Engl J Med* 365, 1014–1024 (2011).
